# Supplementary material
Source: PubMed Central journal article supplement (PMC8602784)
Supplement: NIHMS1739298-supplement-1.pdf [file NIHMS1739298-supplement-1.pdf]

# SUPPLEMENTARY MATERIAL

## Supplementary Figures and Tables

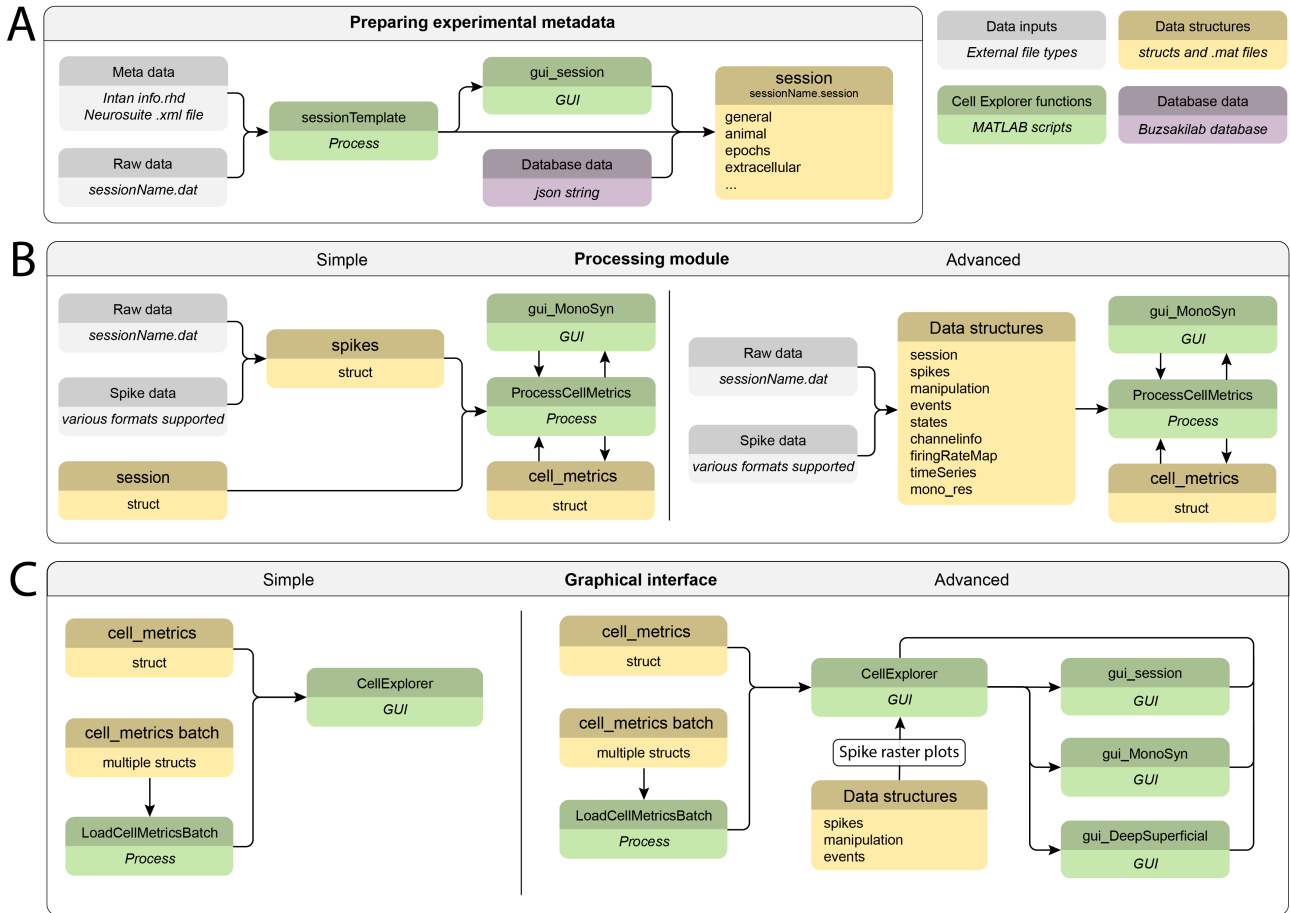

**Supplementary Figure 1. Flow charts, related to figure 2. A)** Generating the metadata structure for a recording session. **B)** Running the processing pipeline. **C)** Running the CellExplorer module for manual curation and exploration. CellExplorer data structures are shown in yellow, MATLAB functions in green, and the input data in grey. Input from the Buzsáki lab database is shown in purple (Petersen et al., 2020).

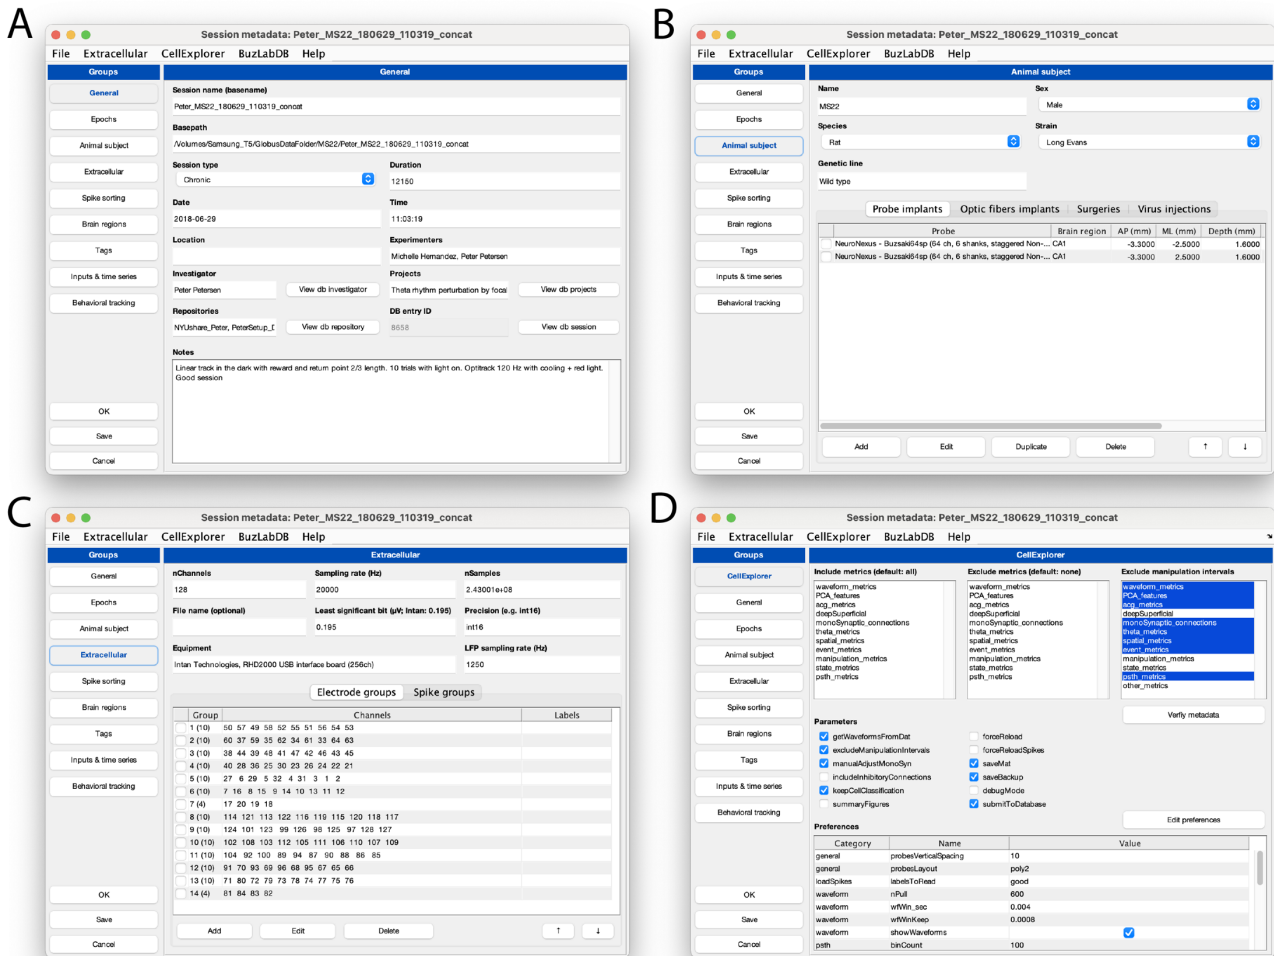

**Supplementary Figure 2: Session metadata GUI, related to figure 2.** The graphical interface for inspection and entry of session level metadata follows the organization of the Matlab struct, with a tab for each field type. **A.** General information about the session, including name, data, duration, location, and notes. **B.** Animal metadata capturing sex, species, strain and genetic line, but also action performed on the animal including probe implants, optic fiber implants, surgeries, and virus injection. **C.** Basic metadata for the extracellular data, including channel count, sampling rate, equipment and electrode groups. **D.** The session GUI is also used as a graphical interface for the processing pipeline (with a dedicated tab), allowing the user to change parameters, view settings, validate metrics, and see and edit the full session metadata structure, that serves as input to the pipeline.

## CellExplorer data structure

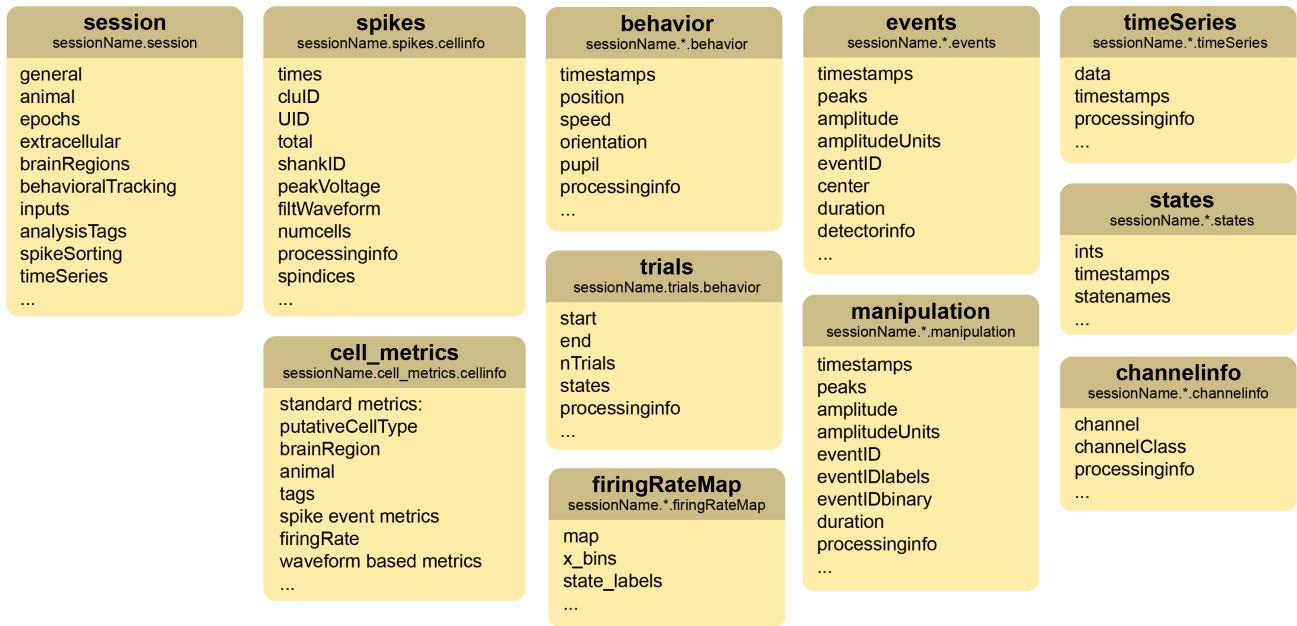

**Supplementary Figure 3: Datatypes related to figure 2.** The data structure. A detailed description is available online at [CellExplorer.org/datastructure/data-structure-and-format](https://CellExplorer.org/datastructure/data-structure-and-format). session, spikes, cell\_metrics, trials are defined data types, while behavior, firingRateMap, events, manipulation, timeseries, states, channelinfo are data containers.

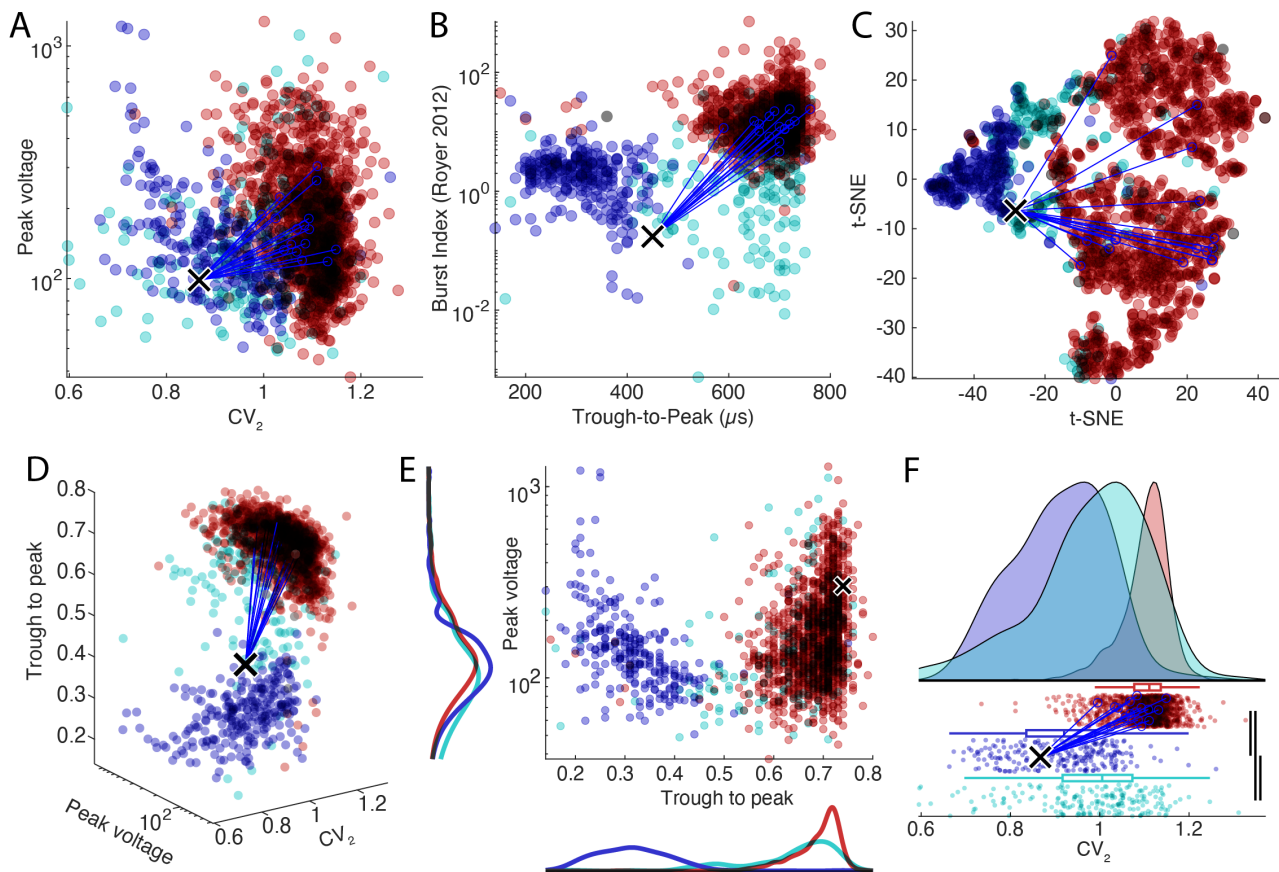

**Supplementary Figure 4. Population data plots, related to figure 3.** **Top row:** The three standard representations: custom plot (A), classic representation (B), and t-SNE plot (C). **Bottom row:** The custom plot has 3 further data representations: a 3-dimensional plot with custom marker size (D), 2D plot with marginal histograms (E), and one-dimensional raincloud plots (F), combining 1D scattered neurons with error bars histogram and KS significance test (line thickness represent significance levels). Color-coded according to cell types: pyramidal cell (red), narrow interneuron (blue), wide interneuron (cyan).

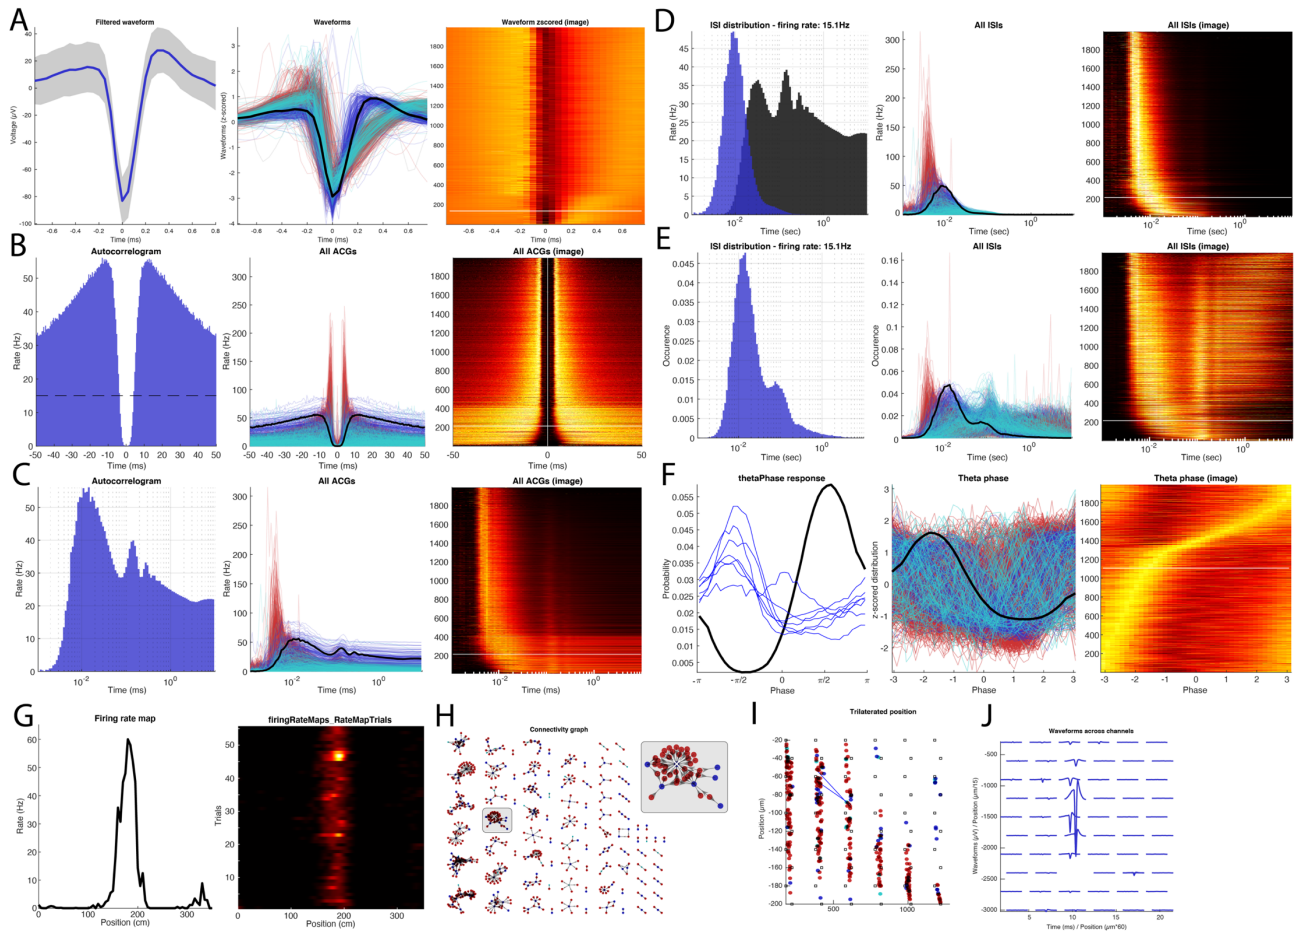

**Supplementary Figure 5. The various single-cell plots, related to figure 3.** Most single cell data-visualizer have three representations: single neurons (with neuronal connections highlighted for a subset of the plots), all neurons (absolute or normalized representations), and an image representation (normalized data, with selected cell highlighted by a white line). **A.** Waveform representations: waveform of a selected single neuron, waveforms of all neurons (absolute or normalized), and their image representation. The white line in the image representation corresponds to the selected neuron. **B.** Autocorrelograms (ACGs) for the single neuron, ACGs for all neurons and their image representation. **C.** ACGs on a log scale (single, all, image). **D, E.** Interspike interval distributions (ISIs) on a log scale (single, all, image) for two different normalizations (**D**, rate (Hz); **E**, occurrence). **F.** Theta phase spike histogram for the single interneuron (black line) and those of pyramidal neurons monosynaptically connected to the interneurons (blue lines; left) and all neurons in the same session (middle and right panels). **G.** Firing rate map for a pyramidal cell. Session average (left) and trial-wise heatmap. **H.** Connectivity graph showing all monosynaptic modules in the dataset. A module is highlighted and enhanced (top right). **I.** Physical location of neurons recorded in the same animal using trilateration. Eight-shank silicon probe recording (8 sites on each shank). Red, pyramidal cells. Blue, interneurons. Monosynaptic connections between two pyramidal cells and a target interneuron are also shown (blue lines) **J.** Average waveform across channels of the single interneurons shown in most panels. A-F, H-J: a narrow interneuron, G: Spatial firing rate of a pyramidal cell on a linear track.

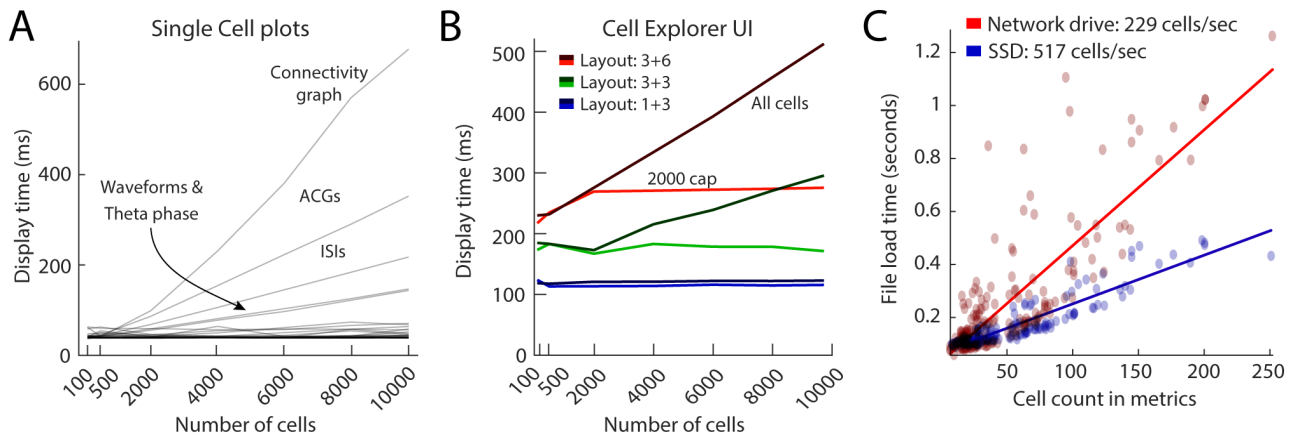

**Supplementary figure 6. Benchmarks of the CellExplorer user interface (UI) related to figure 3.** **A.** Display times for single-cell plots, quantified by the number of cells displayed. The slowest plots are the ones with a trace for each cell (ACGs, ISIs, waveforms, ISIs, theta phase) and the connectivity graph. By default, a maximum of 2000 traces are drawn capping the processing time below ~80 ms for all plots except the connectivity graph for which all connections are shown. **B.** UI display times when switching between units for the three layouts shown in figure 3B (approximately 110 ms for layout 1+3 with 4 subplots; blue lines. 180 ms for layout 3+3 with 6 subplots; green lines) and 290 ms (layout 3+6 with 9 subplots; in red), respectively. Dark gradient colored lines (dark red, green, and blue) indicate where there were no limits on the number of traces plotted for single-cell plots, and the light gradient lines show display times with a maximum of 2000 random traces. **C.** Benchmarks of cell metrics file loading time. On average, 230 cells can be loaded per second quantified across 180 sessions with various cell count (red dots and linear fit in red). By storing the data on a local SSD, the loading time can be decreased and attain cell loading above 500 cells per second. Graphical benchmarks were performed on an iMac from 2017 with a 4.2GHz Quad-Core Intel i7 with 32GB of ram. File load time tests were performed on a custom PC running Window 10, with a 512GB Samsung 870 EVO SSD (SSD) and the NYU Langone Health network storage solution “Research Isilon” (Network drive).

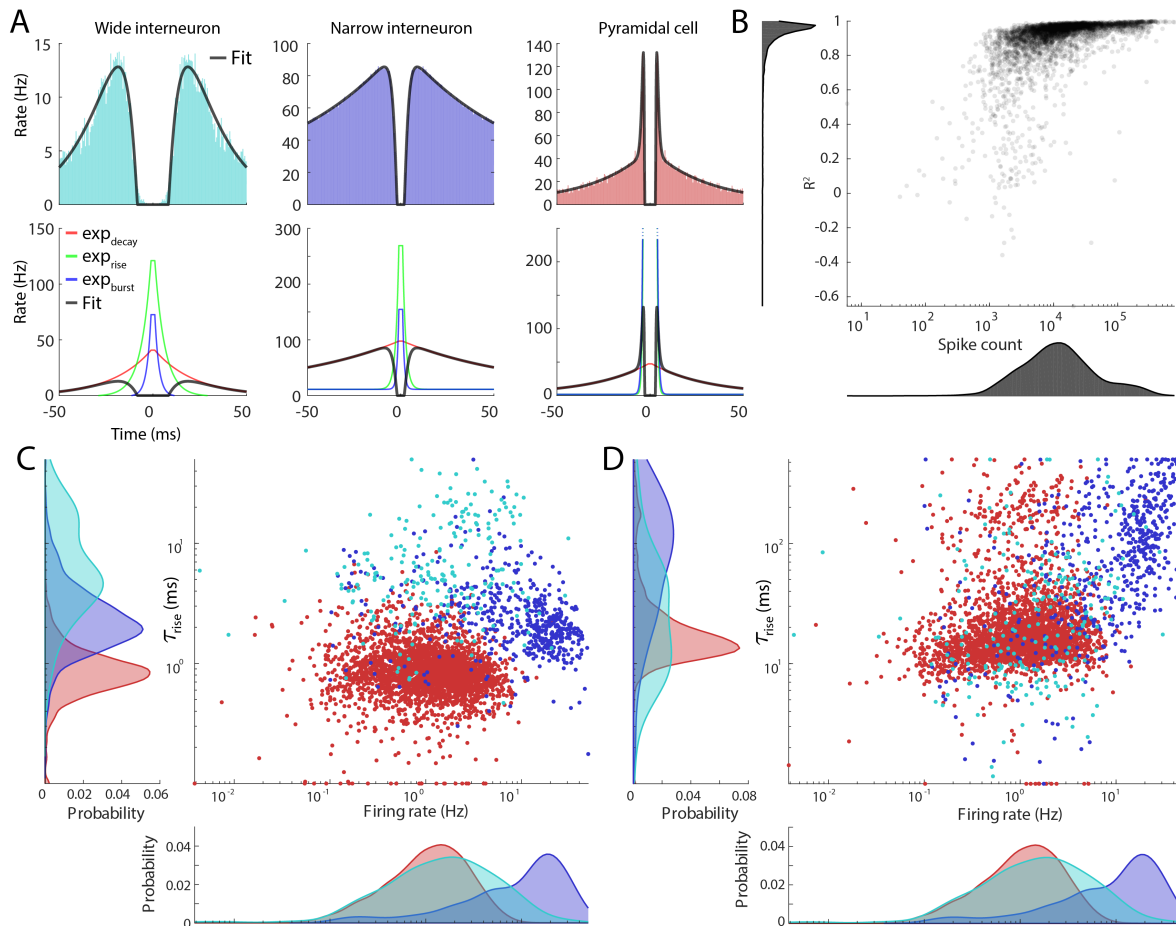

**Supplementary Figure 7. ACG fits related to figure 5. A.** Three examples of typical autocorrelograms for a wide interneuron (left column) narrow interneuron (middle column) and a pyramidal cell (right column). The exponential components are plotted in the lower row. **B.** The  $R^2$  values for each fit across the 4000 cells plotted against the number of spikes. **C-D**  $\tau_{\text{rise}}$  (C) and  $\tau_{\text{decay}}$  (D) values plotted against the firing rate. Color coded by putative cell type.

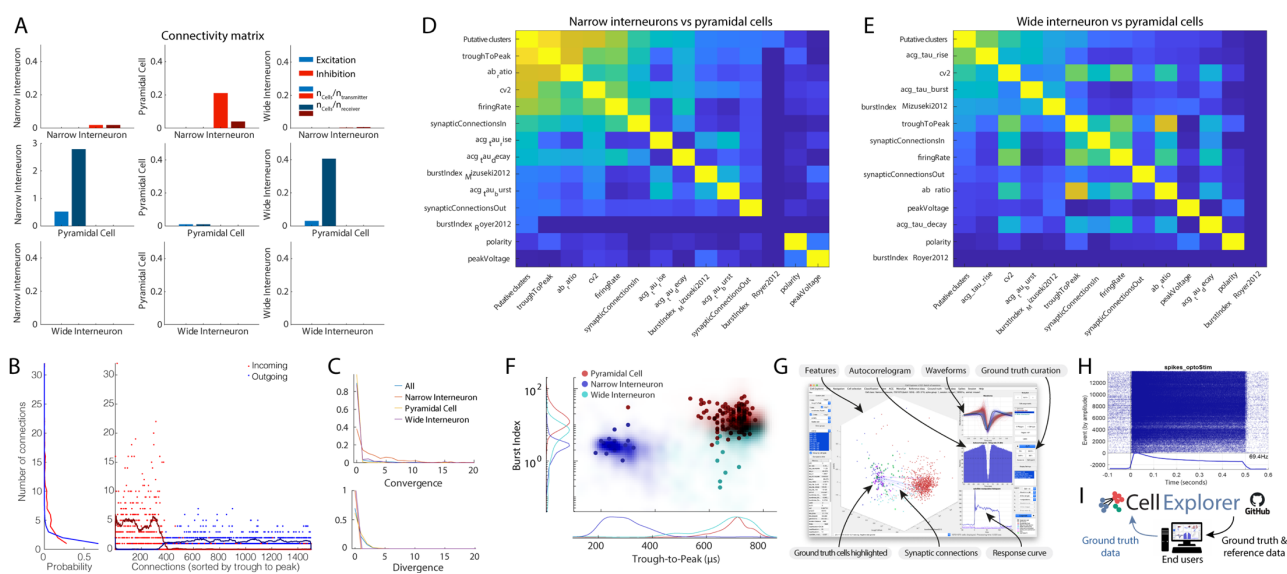

**Supplementary Figure 8. Cell type separation, ground truth- and reference data related to figure 5.**

**A.** Connectivity by cell types. Each panel is a projection pattern showing connection from one cell type to another, both excitatory (blue) and inhibitory (red). The two bars in the same color are normalized by the transmitter and receiver population count. **B.** Every synaptic connection is sorted by the spike waveform trough-to-peak, showing a clear separation between which cells transmit and receive on the basis of spike waveform features. **C.** Convergence and divergence by cell types. **D-E.** Correlation between putative clusters and various metrics. **D:** Narrow interneuron vs pyramidal cells, **E:** Wide interneurons vs pyramidal cells. **F.** Single session (dots) data compared with data from 30 reference sessions (shaded zones). **G.** Opto-tagged data can be processed and curated directly in CellExplorer. **H.** Example of a PSTH of a PV-expressing neuron to 500 ms square light pulses. Raster plot and average responses to the light pulses are visualized in CellExplorer. **I.** The CellExplorer framework allows for sharing ground truth and reference data directly with the end-user. End users can upload their ground truth data to the CellExplorer GitHub repository for communal sharing (see the opto-tagging tutorial at [CellExplorer.org](http://CellExplorer.org)).



| Metrics                              | Description/Calculation                                                                                     | Type                                |
|--------------------------------------|-------------------------------------------------------------------------------------------------------------|-------------------------------------|
| <b>General metrics</b>               |                                                                                                             |                                     |
| general                              | struct containing general information about the session                                                     | struct                              |
| .basename                            | the name of the session                                                                                     | char                                |
| .basepath                            | the path to the raw data                                                                                    | char                                |
| .cellCount                           | number of cells in the current session                                                                      | double                              |
| .ccg                                 | cross correlogram matrix between cell pairs within a session                                                | 201xNxD double                      |
| .ccg_time                            | time vector describing the time bins in the ccg (standard: -100ms:1ms:100ms)                                | 201x1 double                        |
| animal (name)                        | Name of animal subject                                                                                      | 1xN cell array of character vectors |
| general.animal                       | struct containing animal specific information                                                               | struct                              |
| .sex                                 | Sex of the animal [Male, Female, Unknown]                                                                   | char                                |
| .species                             | Animal species [Rat, Mouse,...]                                                                             | char                                |
| .strain                              | Animal strain [Long Evans, C57B1/6,...]                                                                     | char                                |
| .geneticLine                         | Genetic line of the animal                                                                                  | char                                |
| sessionName                          | Name of session                                                                                             | 1xN cell array of character vectors |
| general.session                      | struct containing session specific information                                                              | struct                              |
| .sessionType                         | [Acute, Chronic]                                                                                            | 1xN cell array of character vectors |
| .spikeSortingMethod                  |                                                                                                             | char                                |
| .investigator                        | Name of the investigator                                                                                    | char                                |
| general.processingInfo               | Struct containing processing info: date of the processing, version of the script, function name...          |                                     |
| .params                              | Struct containing the input parameters used by ProcessCellMetrics                                           |                                     |
| UID                                  | The ID for each cell unique within a session (1:nCells)                                                     | 1xN double                          |
| cellID                               |                                                                                                             | 1xN double                          |
| cluID                                | clustering ID from spike sorting pipeline                                                                   | 1xN double                          |
| batchIDs                             | only present in batch sessions. The batch ids the cells                                                     | 1xN double                          |
| putativeCellType                     | Putative cell type                                                                                          | 1xN cell array of character vectors |
| brainRegion                          | Brain region acronyms from Allan institute Brain atlas.                                                     | 1xN cell array of character vectors |
| shankID                              | Shank number / electrode group                                                                              | 1xN double                          |
| labels                               | Custom labels                                                                                               | 1xN cell array of character vectors |
| groups                               | struct containing groups                                                                                    | struct                              |
| tags                                 | struct containing tags                                                                                      | struct                              |
| <b>Spike event-based metrics</b>     |                                                                                                             |                                     |
| spikes.times                         | struct containing spike times                                                                               |                                     |
| spikeCount                           | Spike count of the cell from the entire session                                                             | 1xN double                          |
| firingRate                           | Firing rate in Hz: Spike count normalized by the interval between the first and the last spike.             | 1xN double                          |
| cv2                                  | Coefficient of variation                                                                                    | 1xN double                          |
| refractoryPeriodViolation            | Refractory period violation (%): Fraction of ISIs less than 2ms.                                            | 1xN double                          |
| burstIndex_Mizuseki2012              | Burst index: Fraction of spikes with a neighboring ISI < 6ms as defined in Mizuseki et al. Hippocampus 2012 | 1xN double                          |
| <b>Waveform metrics</b>              |                                                                                                             |                                     |
| waveform                             | struct containing waveform information                                                                      | struct                              |
| .filt                                | Average filtered waveform from peak channel ( $\mu\text{V}$ )                                               | 1xN cell array of numeric vectors   |
| .filt_std                            | Std of average filtered waveform ( $\mu\text{V}$ )                                                          | 1xN cell array of numeric vectors   |
| .raw                                 | Average raw waveform from peak channel ( $\mu\text{V}$ )                                                    | 1xN cell array of numeric vectors   |
| .raw_std                             | Std of average raw waveform ( $\mu\text{V}$ )                                                               | 1xN cell array of numeric vectors   |
| .time                                | Time vector (ms)                                                                                            | 1xN cell array of numeric vectors   |
| maxWaveformCh                        | peak channel (0-indexed)                                                                                    | 1xN double                          |
| maxWaveformCh1                       | peak channel (1-indexed)                                                                                    | 1xN double                          |
| maxWaveformChannelOrder              | linearized channel position                                                                                 |                                     |
| polarity                             | waveform polarity                                                                                           |                                     |
| troughToPeak                         | waveform trough to peak interval ( $\mu\text{s}$ )                                                          | 1xN double                          |
| ab_ratio                             | waveform peak to peak ratio                                                                                 | 1xN double                          |
| peakVoltage                          | amplitude of the filtered waveform ( $\mu\text{V}$ ). max(waveform)-min(waveform).                          | 1xN double                          |
| troughToPeakDerivative               | derivative of waveform trough to peak interval ( $\mu\text{s}$ )                                            | 1xN double                          |
| <b>Autocorrelogram (ACG) metrics</b> |                                                                                                             |                                     |
| acg                                  | struct containing autocorrelogram information                                                               | struct                              |
| .wide                                | [-1000ms:1ms:1000ms]                                                                                        | 1xN cell array of numeric vectors   |
| .narrow                              | [-50:0.5:50]                                                                                                | 1xN cell array of numeric vectors   |
| .log10                               | [log-intervals spanning 1ms:10s]                                                                            | 1xN cell array of numeric vectors   |

|                                              |                                                                                                                                                                                                                                                                                                    |                                     |
|----------------------------------------------|----------------------------------------------------------------------------------------------------------------------------------------------------------------------------------------------------------------------------------------------------------------------------------------------------|-------------------------------------|
| thetaModulationIndex                         | defined by the difference between the theta modulation trough (mean of autocorrelogram bins 50-70 ms) and the theta modulation peak (mean of autocorrelogram bins 100-140ms) over their sum.                                                                                                       | 1xN double                          |
| ACG fit metrics                              | Fit to the autocorrelogram with a triple-exponential equation ( $fit = c \exp(-x/\tau_{decay}) - d \exp(-x/\tau_{rise})$ )                                                                                                                                                                         | 1xN double                          |
| acg_asymptote                                | the asymptote of the ACG fit                                                                                                                                                                                                                                                                       | 1xN double                          |
| acg_c                                        | ACG fit: amplitude                                                                                                                                                                                                                                                                                 | 1xN double                          |
| acg_d                                        | ACG fit: amplitude                                                                                                                                                                                                                                                                                 | 1xN double                          |
| acg_fit_rsquare                              | ACG fit R-square (the goodness of the fit)                                                                                                                                                                                                                                                         | 1xN double                          |
| acg_h                                        | ACG fit: amplitude                                                                                                                                                                                                                                                                                 | 1xN double                          |
| acg_refrac                                   | ACG fit: refractory period (ms)                                                                                                                                                                                                                                                                    | 1xN double                          |
| acg_tau_burst                                | ACG fit: tau bursts (ms)                                                                                                                                                                                                                                                                           | 1xN double                          |
| acg_tau_decay                                | ACG fit: tau decay (ms)                                                                                                                                                                                                                                                                            | 1xN double                          |
| acg_tau_rise                                 | ACG fit tau rise (ms)                                                                                                                                                                                                                                                                              | 1xN double                          |
| burstIndex_Royer2012                         | Burst index (Royer 2012)                                                                                                                                                                                                                                                                           | 1xN double                          |
| burstIndex_Doublets                          | Burst index doublets                                                                                                                                                                                                                                                                               | 1xN double                          |
| <b>Interspike Intervals (ISI) metrics</b>    |                                                                                                                                                                                                                                                                                                    |                                     |
| isi                                          | struct with interspike interval information                                                                                                                                                                                                                                                        | struct                              |
| .log10                                       | [log-intervals spanning 1ms:10s]                                                                                                                                                                                                                                                                   | 1xN cell array of numeric vectors   |
| <b>Putative connections</b>                  |                                                                                                                                                                                                                                                                                                    |                                     |
| putativeConnections                          | putative connections determined from cross correlograms                                                                                                                                                                                                                                            | struct                              |
| putativeConnections.excitatory               | Excitatory connection pairs                                                                                                                                                                                                                                                                        | 2xP double                          |
| putativeConnections.inhibitory               | Inhibitory connection pairs                                                                                                                                                                                                                                                                        | 2xP double                          |
| synapticEffect                               | Excitatory' or 'Inhibitory'                                                                                                                                                                                                                                                                        | 1xN cell array of character vectors |
| synapticConnectionsIn                        | Synaptic connections count                                                                                                                                                                                                                                                                         | 1xN double                          |
| synapticConnectionsOut                       | Synaptic connections count                                                                                                                                                                                                                                                                         | 1xN double                          |
| <b>Event metrics</b>                         |                                                                                                                                                                                                                                                                                                    |                                     |
| events                                       | event time series                                                                                                                                                                                                                                                                                  | struct                              |
| .name'                                       | the event curve                                                                                                                                                                                                                                                                                    | 1xN cell array of numeric vectors   |
| _modulationIndex                             | modulation index for each event types                                                                                                                                                                                                                                                              | 1xN double                          |
| _modulationSignificanceLevel                 | modulation significance level for each event types                                                                                                                                                                                                                                                 |                                     |
| _modulationPeakResponseTime                  | modulation peak response time for each event types                                                                                                                                                                                                                                                 | 1xN double                          |
| <b>Firing rate map metrics</b>               |                                                                                                                                                                                                                                                                                                    |                                     |
| firingRateMaps                               | struct with (spatial) linearized firing rate maps                                                                                                                                                                                                                                                  | struct                              |
| .ratemap                                     | Primary firing rate map                                                                                                                                                                                                                                                                            | 1xN cell array of numeric vectors   |
| .ratemapName'                                | Other firing rate maps                                                                                                                                                                                                                                                                             | 1xN cell array of numeric vectors   |
| spatialCoverageIndex                         | Spatial coverage index. Defined from the inverse cumulative distribution, where bins are sorted by decreasing rate. The 75 percentile point defines the spatial coverage by the fraction of bins below and above the point (defined by Royer et al., NN 2012)                                      | 1xN double                          |
| spatialGiniCoeff                             | Spatial Gini coefficient. Defined as the Gini coefficient of the firing rate map                                                                                                                                                                                                                   | 1xN double                          |
| spatialCoherence                             | Spatial Coherence. Defined by the degree of correlation between the firing rate map and a hollow convolution with the same map                                                                                                                                                                     | 1xN double                          |
| spatialPeakRate                              | Spatial peak firing rate (Hz). Defined as the peak rate from the firing rate map                                                                                                                                                                                                                   | 1xN double                          |
| placeFieldsCount                             | Place field count: Number of intervals along the firing rate map that fulfills a set of spatial criteria: minimum rate of 2Hz and above 10% of the maximum firing rate bin and minimum of 4 connecting bins. The cell further has to have a spatial coherence greater than 0.6 (Mizuseki et al ?). | 1xN double                          |
| spatialSplitterDegree                        |                                                                                                                                                                                                                                                                                                    | 1xN double                          |
| placeCell                                    | Place cell (determined from the Mizuseki spatial metrics)                                                                                                                                                                                                                                          | 1xN binary                          |
| <b>Manipulation metrics</b>                  |                                                                                                                                                                                                                                                                                                    |                                     |
| manipulations                                | manipulations time series                                                                                                                                                                                                                                                                          | struct                              |
| .manipulationName'                           |                                                                                                                                                                                                                                                                                                    | 1xN cell array of character vectors |
| <b>Response curves metrics</b>               |                                                                                                                                                                                                                                                                                                    |                                     |
| responseCurves                               | response curves                                                                                                                                                                                                                                                                                    | struct                              |
| .responseCurveName'                          |                                                                                                                                                                                                                                                                                                    | 1xN cell array of character vectors |
| <b>Quality metrics</b>                       |                                                                                                                                                                                                                                                                                                    |                                     |
| refractoryPeriodViolation                    | Refractory period violation (%): Fraction of ISIs less than 2ms                                                                                                                                                                                                                                    | 1xN double                          |
| isolationDistance                            | Isolation distance as defined by Schmitzer-Torbert et al. Neuroscience. 2005.                                                                                                                                                                                                                      | 1xN double                          |
| lRatio                                       | L-ratio as defined by Schmitzer-Torbert et al. Neuroscience. 2005.                                                                                                                                                                                                                                 | 1xN double                          |
| <b>Hippocampal sharp wave ripple metrics</b> |                                                                                                                                                                                                                                                                                                    |                                     |
| deepSuperficial                              | Deep-Superficial region assignment [Unknown, Cortical, Superficial, Deep]                                                                                                                                                                                                                          |                                     |
| deepSuperficialDistance                      | Deep Superficial depth relative to the reversal of the sharp wave ( $\mu\text{m}$ )                                                                                                                                                                                                                | 1xN double                          |
| <b>Hippocampal theta oscillation metrics</b> |                                                                                                                                                                                                                                                                                                    |                                     |
| thetaPhasePeak                               | Theta phase peak                                                                                                                                                                                                                                                                                   | 1xN double                          |
| thetaPhaseTrough                             | Theta phase trough                                                                                                                                                                                                                                                                                 | 1xN double                          |

|                                      |                                                                                                                     |            |
|--------------------------------------|---------------------------------------------------------------------------------------------------------------------|------------|
| thetaEntrainment                     | Theta entrainment                                                                                                   | 1xN double |
| thetaModulationIndex                 | Theta modulation index, determined from the ACG                                                                     | 1xN double |
| <b>Firing rate stability metrics</b> |                                                                                                                     |            |
| firingRateGiniCoeff                  | The Gini coefficient of the firing rate across time                                                                 | 1xN double |
| firingRateCV                         | Standard deviation of the "firing rate across time" divided by the mean'                                            | 1xN double |
| firingRateInstability                | Mean of the absolute differential "firing rate across time" divided by the mean.<br>abs(diff(firingRateAcrossTime)) | 1xN double |

**Supplementary Table 1: Cell metrics, related to figure 1.** An incomplete list of the standard cell metrics. The full list is available online at [CellExplorer.org/datastructure/standard-cell-metrics](http://CellExplorer.org/datastructure/standard-cell-metrics)

| Functions                             | Description                                                                                                                                              |
|---------------------------------------|----------------------------------------------------------------------------------------------------------------------------------------------------------|
| <b>sessionTemplate</b>                | A template script which automatically extracts and imports relevant metadata                                                                             |
| <b>gui_session</b>                    | A graphical user interface (GUI) for inspection and entry of metadata                                                                                    |
| <b>ProcessCellMetrics</b>             | The processing module                                                                                                                                    |
| <b>CellExplorer</b>                   | The main graphical interface of CellExplorer                                                                                                             |
| <b>preferences_CellExplorer</b>       | Preferences for the graphical interface                                                                                                                  |
| <b>preferences_ProcessCellMetrics</b> | Preferences for the processing module                                                                                                                    |
| <b>NeuroScope2</b>                    | An Ephys visualizer built upon the data structure of CellExplorer                                                                                        |
| <b>gui_MonoSyn</b>                    | GUI for manual curation of monosynaptic connections                                                                                                      |
| <b>gui_DeepSuperficial</b>            | GUI for manual curation of the depth assignment of neurons based on depth-related changes of sharp-wave-ripples (Mizuseki et al., 2011)                  |
| <b>loadCellMetricsBatch</b>           | Batch loading script for combining cell_metrics structs across sessions                                                                                  |
| <b>loadCellMetrics</b>                | Script for loading cell_metrics with built-in common text filters (putative cell type, brain region, synaptic effect, label, animal, tags, groups, etc.) |
| <b>loadSpikes</b>                     | Script for importing and loading spike data                                                                                                              |
| <b>saveStruct</b>                     | Saving to various file containers (e.g. cellinfo, behavior, session, events, states)                                                                     |
| <b>saveCellMetrics</b>                | Saving cell metrics                                                                                                                                      |

**Supplementary Table 2. Primary MATLAB functions of the CellExplorer framework, related to Star method, related to figure 2.** All code is available at GitHub: <https://github.com/petersenpeter/CellExplorer>.
